# Supplementary material
Source: Springer Nature journal article supplement (https://www.springermedizin.de/resource/supplementary/12959_2004_25_MOESM6_ESM.doc/9569422)

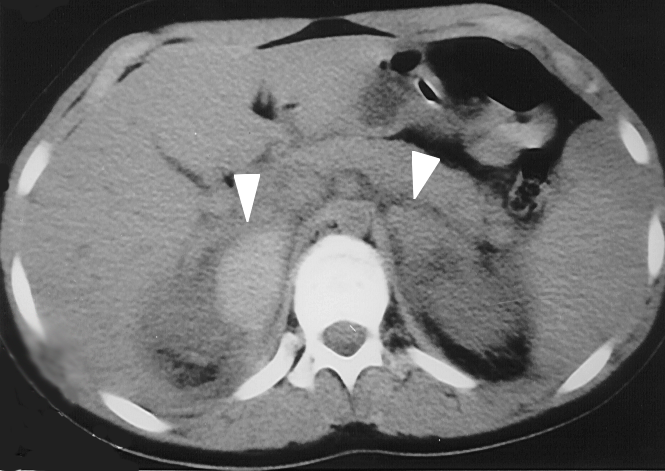

Supplement: MOESM6 [file 9569422]
